# Supplementary material for: New Carvone-Based Deep Eutectic Solvents for Siloxanes Capture from Biogas
Source: MDPI journal article supplement (doi:10.3390/ijms22179551), 2021-09-02
Supplement: s1 [file s1]

## Electronic Supplementary Information (ESI)

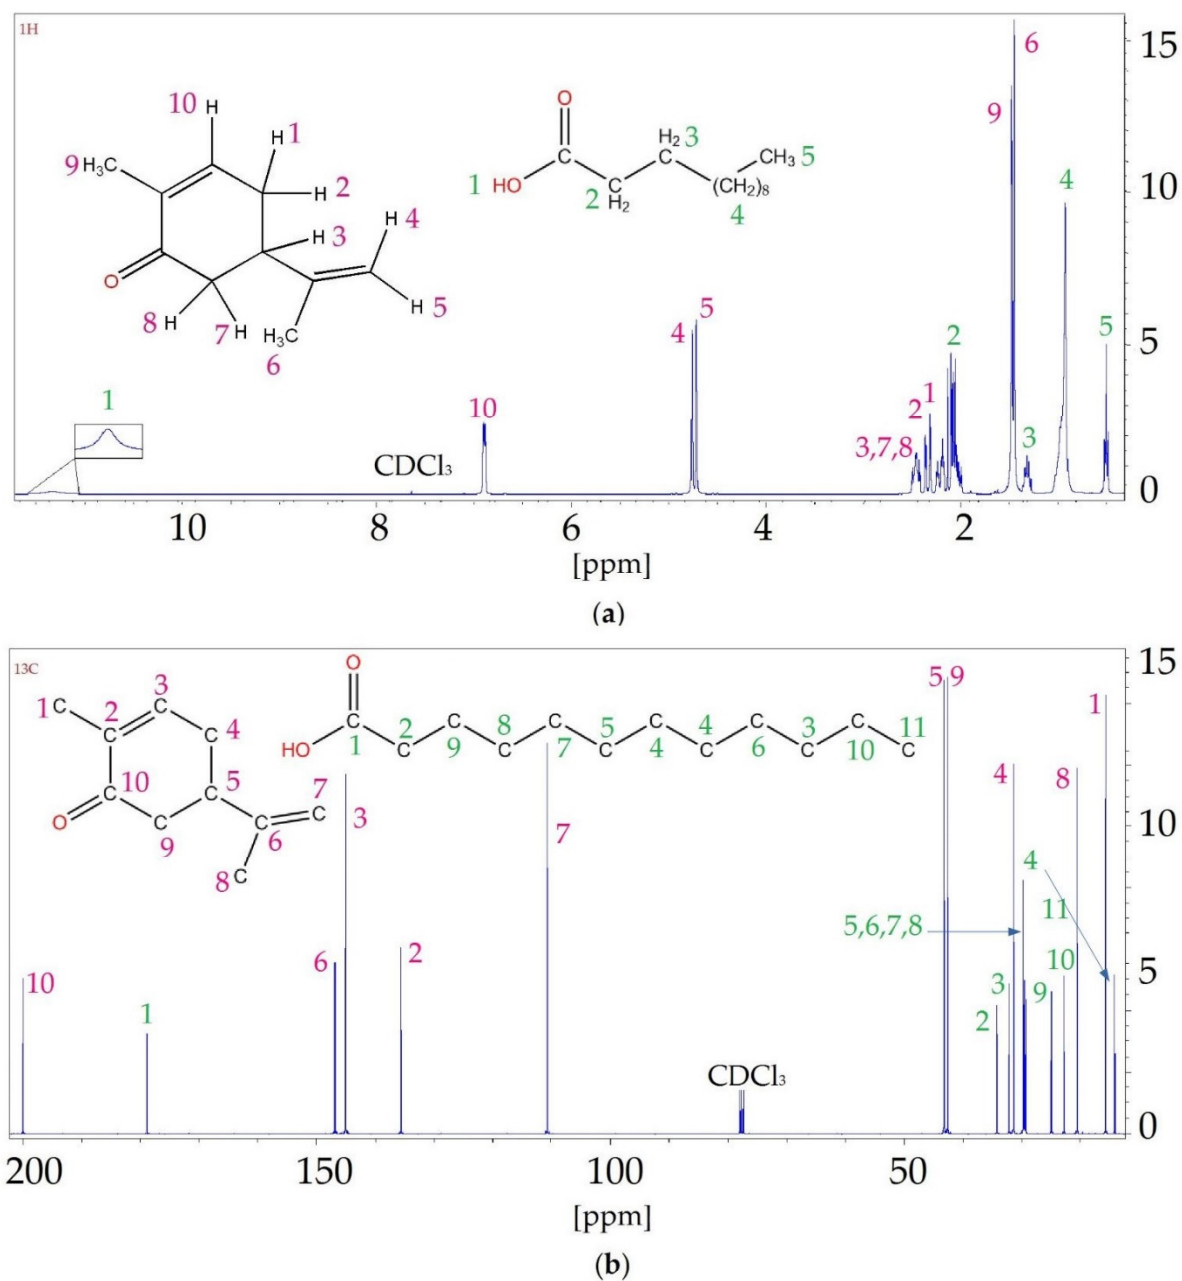

Figure S1.  $^1\text{H}$ -NMR (a) and  $^{13}\text{C}$ -NMR (b) spectra of C:DDA (3:1).



**Table S1.** Chemical shift values from the  $^1\text{H}$  NMR and  $^{13}\text{C}$  NMR spectra for C:DDA (3:1).

| $^1\text{H}$ NMR |                |             |                |      |                |             |                |
|------------------|----------------|-------------|----------------|------|----------------|-------------|----------------|
| C                |                | C:DDA (3:1) |                | DDA  |                | C:DDA (3:1) |                |
| atom             | $\delta$ [ppm] | atom        | $\delta$ [ppm] | atom | $\delta$ [ppm] | atom        | $\delta$ [ppm] |
| H1               | 2.45           | H1          | 2.26           | H1   | 11.87          | H1          | 10.69          |
| H2               | 2.30           | H2          | 2.30           | H2   | 2.34           | H2          | 2.16           |
| H3               | 2.69           | H3          | 2.51           | H3   | 1.64           | H3          | 1.46           |
| H4               | 4.76           | H4          | 4.63           | H4   | 1.26           | H4          | 1.1            |
| H5               | 4.81           | H5          | 4.59           | H5   | 0.88           | H5          | 0.71           |
| H6               | 1.76           | H6          | 1.58           |      |                |             |                |
| H7               | 2.57           | H7          | 2.42           |      |                |             |                |
| H8               | 2.35           | H8          | 2.38           |      |                |             |                |
| H9               | 1.78           | H9          | 1.60           |      |                |             |                |
| H10              | 6.77           | H10         | 6.60           |      |                |             |                |

  

| $^{13}\text{C}$ NMR |        |             |        |     |        |             |        |
|---------------------|--------|-------------|--------|-----|--------|-------------|--------|
| C                   |        | C:DDA (3:1) |        | DDA |        | C:DDA (3:1) |        |
| C1                  | 15.63  | C1          | 15.46  | C1  | 180.74 | C1          | 178.39 |
| C2                  | 135.45 | C2          | 135.17 | C2  | 34.21  | C2          | 33.87  |
| C3                  | 144.40 | C3          | 144.62 | C3  | 31.99  | C3          | 31.77  |
| C4                  | 31.30  | C4          | 31.06  | C4  | 29.68  | C4          | 29.48  |
| C5                  | 42.55  | C5          | 42.87  | C5  | 29.52  | C5          | 29.32  |
| C6                  | 146.69 | C6          | 146.43 | C6  | 29.42  | C6          | 29.20  |
| C7                  | 110.47 | C7          | 110.31 | C7  | 29.34  | C7          | 29.15  |
| C8                  | 20.50  | C8          | 20.28  | C8  | 29.15  | C8          | 28.96  |
| C9                  | 43.20  | C9          | 42.30  | C9  | 24.75  | C9          | 24.62  |
| C10                 | 199.34 | C10         | 199.47 | C10 | 22.76  | C10         | 22.52  |
|                     |        |             |        | C11 | 14.13  | C11         | 13.93  |

**Table S2.** Chemical shift values from the  $^1\text{H}$  NMR and  $^{13}\text{C}$  NMR spectra for C:UDA (1:1).

| $^1\text{H}$ NMR |                |             |                |      |                |             |                |
|------------------|----------------|-------------|----------------|------|----------------|-------------|----------------|
| C                |                | C:UDA (1:1) |                | UDA  |                | C:UDA (1:1) |                |
| atom             | $\delta$ [ppm] | atom        | $\delta$ [ppm] | atom | $\delta$ [ppm] | atom        | $\delta$ [ppm] |
| H1               | 2.45           | H1          | 2.32           | H1   | 10.4           | H1          | 11.43          |
| H2               | 2.30           | H2          | 2.36           | H2   | 2.34           | H2          | 2.22           |
| H3               | 2.69           | H3          | 2.57           | H3   | 1.63           | H3          | 1.52           |
| H4               | 4.76           | H4          | 4.69           | H4   | 1.27           | H4          | 1.16           |
| H5               | 4.81           | H5          | 4.65           | H5   | 0.88           | H5          | 0.77           |
| H6               | 1.76           | H6          | 1.64           |      |                |             |                |
| H7               | 2.57           | H7          | 2.50           |      |                |             |                |
| H8               | 2.35           | H8          | 2.46           |      |                |             |                |
| H9               | 1.78           | H9          | 1.67           |      |                |             |                |
| H10              | 6.77           | H10         | 6.65           |      |                |             |                |

  

| $^{13}\text{C}$ NMR |        |             |        |     |        |             |        |
|---------------------|--------|-------------|--------|-----|--------|-------------|--------|
| C                   |        | C:UDA (1:1) |        | UDA |        | C:UDA (1:1) |        |
| C1                  | 15.63  | C1          | 15.48  | C1  | 180.76 | C1          | 179.51 |
| C2                  | 135.45 | C2          | 135.29 | C2  | 34.25  | C2          | 33.95  |
| C3                  | 144.40 | C3          | 144.76 | C3  | 32.00  | C3          | 31.80  |
| C4                  | 31.30  | C4          | 31.12  | C4  | 29.66  | C4          | 29.47  |

|     |        |     |        |     |       |     |       |
|-----|--------|-----|--------|-----|-------|-----|-------|
| C5  | 42.55  | C5  | 42.89  | C5  | 29.54 | C5  | 29.36 |
| C6  | 146.69 | C6  | 146.46 | C6  | 29.41 | C6  | 29.22 |
| C7  | 110.47 | C7  | 110.37 | C7  | 29.37 | C7  | 29.17 |
| C8  | 20.50  | C8  | 20.29  | C8  | 29.18 | C8  | 28.98 |
| C9  | 43.20  | C9  | 42.34  | C9  | 24.77 | C9  | 24.61 |
| C10 | 199.34 | C10 | 199.74 | C10 | 22.77 | C10 | 22.56 |
|     |        |     |        | C11 | 14.14 | C11 | 13.94 |

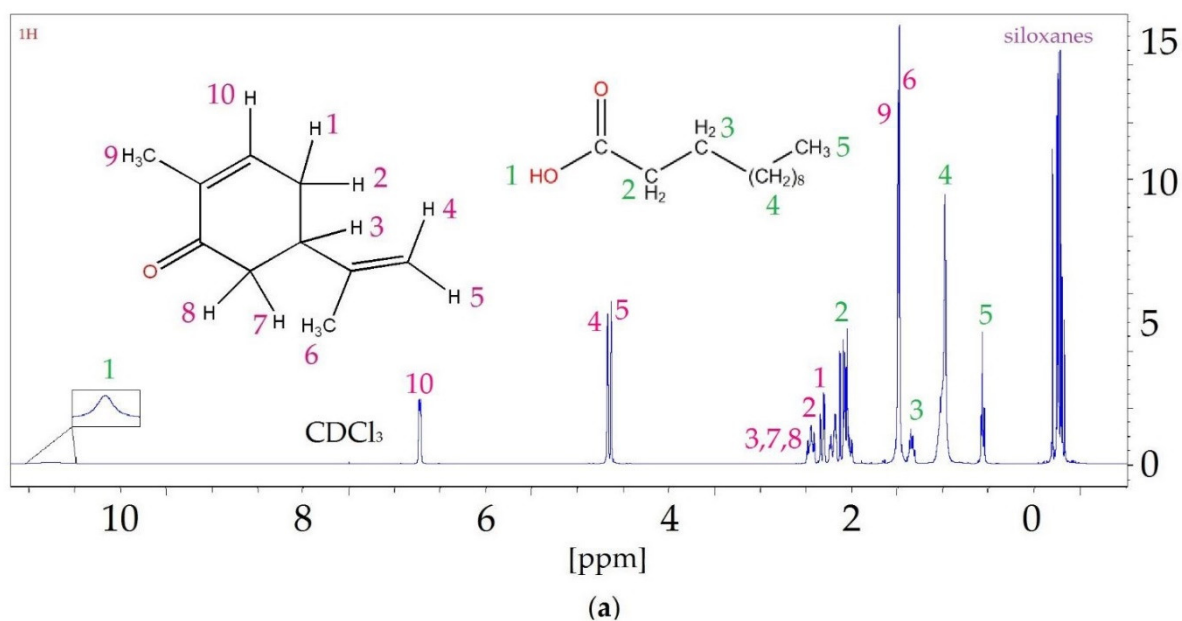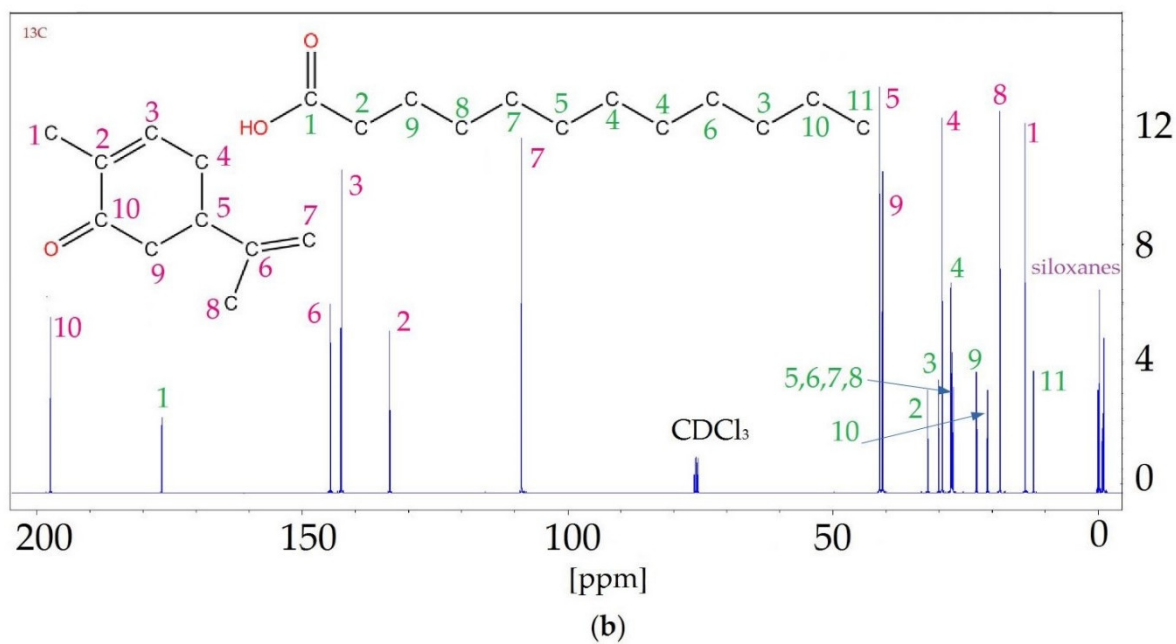

**Figure S3.**  $^1\text{H}$  NMR (a) and  $^{13}\text{C}$  NMR (b) spectra for C:DDA (3:1) after the absorption process.

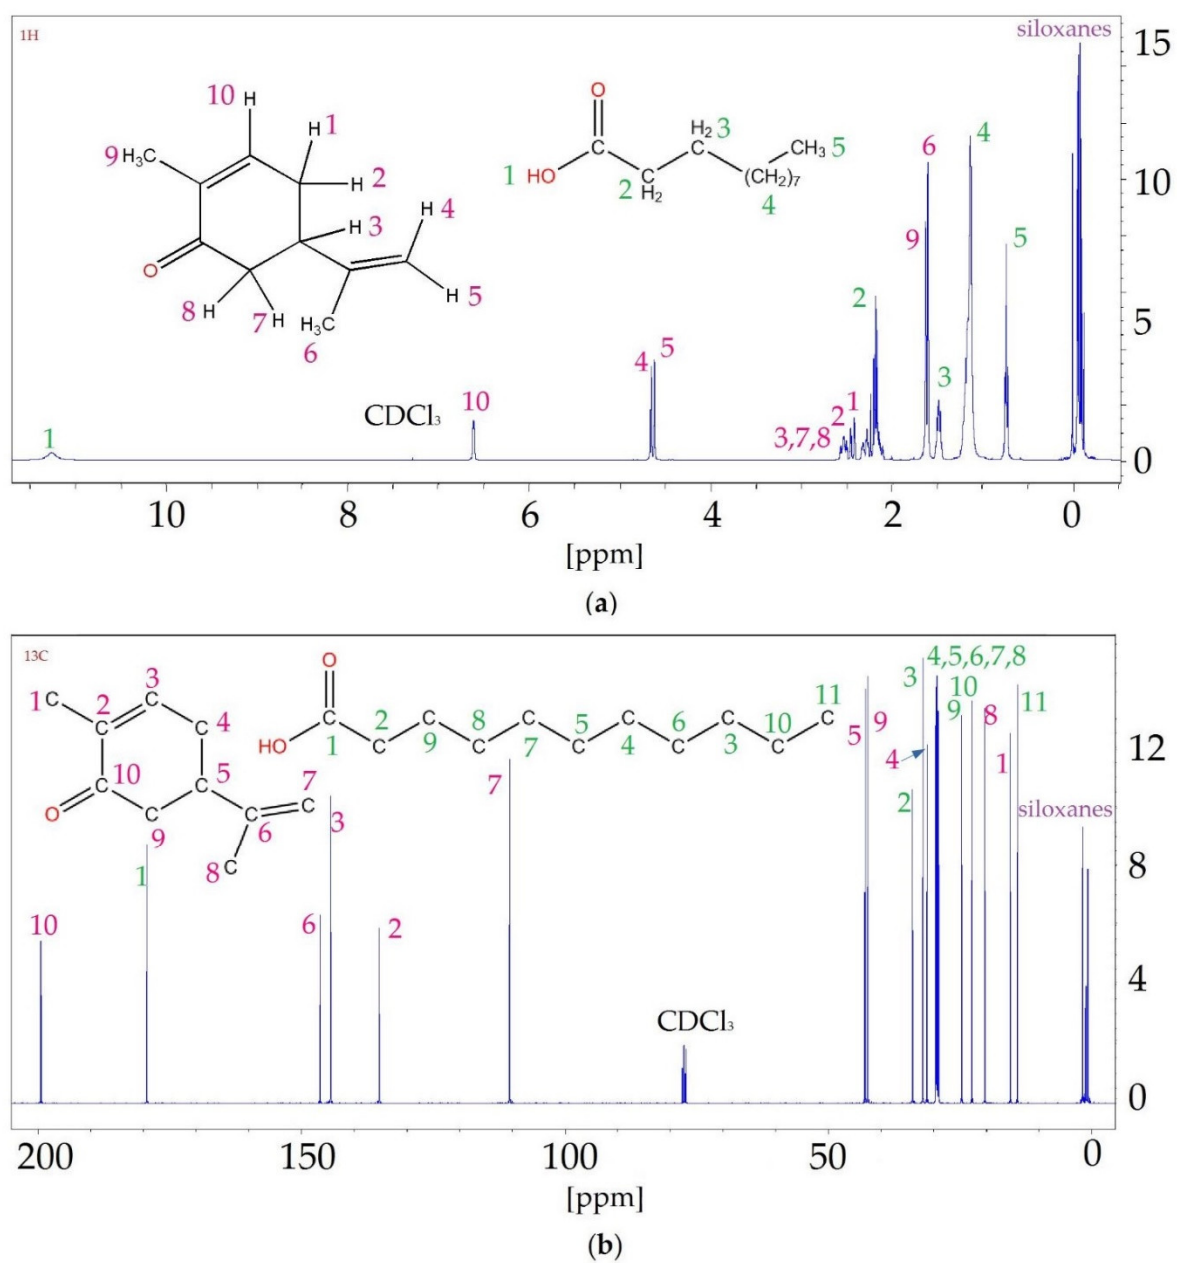

**Figure S4.**  $^1\text{H}$  NMR (a) and  $^{13}\text{C}$  NMR (b) spectra for C:UDA (1:1) after the absorption process.

**Table S3.** Chemical shift values from  $^1\text{H}$  NMR and  $^{13}\text{C}$  NMR spectra of C:DDA (3:1) after the absorption process.

| $^1\text{H}$ NMR |                |                |                |      |                |                |                |
|------------------|----------------|----------------|----------------|------|----------------|----------------|----------------|
| C                |                | C:DDA (1:1)+Si |                | DDA  |                | C:DDA (1:1)+Si |                |
| atom             | $\delta$ [ppm] | atom           | $\delta$ [ppm] | atom | $\delta$ [ppm] | atom           | $\delta$ [ppm] |
| H1               | 2.26           | H1             | 2.21           | H1   | 10.69          | H1             | 10.41          |
| H2               | 2.30           | H2             | 2.25           | H2   | 2.16           | H2             | 2.11           |
| H3               | 2.51           | H3             | 2.46           | H3   | 1.46           | H3             | 1.41           |
| H4               | 4.63           | H4             | 4.58           | H4   | 1.10           | H4             | 1.06           |
| H5               | 4.59           | H5             | 4.54           | H5   | 0.71           | H5             | 0.67           |
| H6               | 1.58           | H6             | 1.54           |      |                |                |                |
| H7               | 2.42           | H7             | 2.36           |      |                |                |                |
| H8               | 2.38           | H8             | 2.32           |      |                |                |                |
| H9               | 1.60           | H9             | 1.55           |      |                |                |                |
| H10              | 6.60           | H10            | 6.55           |      |                |                |                |

  

| $^{13}\text{C}$ NMR |        |                |        |     |        |                |        |
|---------------------|--------|----------------|--------|-----|--------|----------------|--------|
| C                   |        | C:DDA (1:1)+Si |        | DDA |        | C:DDA (1:1)+Si |        |
| C1                  | 15.46  | C1             | 15.35  | C1  | 178.39 | C1             | 178.02 |
| C2                  | 135.17 | C2             | 135.13 | C2  | 33.87  | C2             | 33.77  |
| C3                  | 144.62 | C3             | 144.25 | C3  | 31.77  | C3             | 31.72  |
| C4                  | 31.06  | C4             | 31.00  | C4  | 29.48  | C4             | 29.45  |
| C5                  | 42.87  | C5             | 42.78  | C5  | 29.32  | C5             | 29.29  |
| C6                  | 146.43 | C6             | 146.35 | C6  | 29.20  | C6             | 29.16  |
| C7                  | 110.31 | C7             | 110.26 | C7  | 29.15  | C7             | 29.11  |
| C8                  | 20.28  | C8             | 20.15  | C8  | 28.96  | C8             | 28.91  |
| C9                  | 42.30  | C9             | 42.26  | C9  | 24.62  | C9             | 24.56  |
| C10                 | 199.47 | C10            | 199.04 | C10 | 22.52  | C10            | 22.46  |
|                     |        |                |        | C11 | 13.93  | C11            | 13.84  |

**Table S4.** Chemical shift values from  $^1\text{H}$  NMR and  $^{13}\text{C}$  NMR spectra of C:UDA (1:1) after the absorption process.

| $^1\text{H}$ NMR    |                |                |                |      |                |                |                |
|---------------------|----------------|----------------|----------------|------|----------------|----------------|----------------|
| C                   |                | C:UDA (1:1)+Si |                | UDA  |                | C:UDA (1:1)+Si |                |
| atom                | $\delta$ [ppm] | atom           | $\delta$ [ppm] | atom | $\delta$ [ppm] | atom           | $\delta$ [ppm] |
| H1                  | 2.32           | H1             | 2.27           | H1   | 11.43          | H1             | 11.26          |
| H2                  | 2.36           | H2             | 2.32           | H2   | 2.22           | H2             | 2.18           |
| H3                  | 2.57           | H3             | 2.53           | H3   | 1.52           | H3             | 1.49           |
| H4                  | 4.69           | H4             | 4.58           | H4   | 1.16           | H4             | 1.14           |
| H5                  | 4.65           | H5             | 4.54           | H5   | 0.77           | H5             | 0.74           |
| H6                  | 1.64           | H6             | 1.54           |      |                |                |                |
| H7                  | 2.50           | H7             | 2.36           |      |                |                |                |
| H8                  | 2.46           | H8             | 2.32           |      |                |                |                |
| H9                  | 1.67           | H9             | 1.55           |      |                |                |                |
| H10                 | 6.65           | H10            | 6.55           |      |                |                |                |
| $^{13}\text{C}$ NMR |                |                |                |      |                |                |                |
| C                   |                | C:UDA (1:1)+Si |                | UDA  |                | C:UDA (1:1)+Si |                |
| C1                  | 15.48          | C1             | 15.39          | C1   | 179.51         | C1             | 179.19         |
| C2                  | 135.29         | C2             | 135.21         | C2   | 33.95          | C2             | 33.86          |
| C3                  | 144.76         | C3             | 144.41         | C3   | 31.80          | C3             | 31.77          |
| C4                  | 31.12          | C4             | 31.09          | C4   | 29.47          | C4             | 29.44          |
| C5                  | 42.89          | C5             | 42.83          | C5   | 29.36          | C5             | 29.34          |
| C6                  | 146.46         | C6             | 146.31         | C6   | 29.22          | C6             | 29.14          |
| C7                  | 110.37         | C7             | 110.28         | C7   | 29.17          | C7             | 29.15          |
| C8                  | 20.29          | C8             | 20.18          | C8   | 28.98          | C8             | 28.95          |
| C9                  | 42.34          | C9             | 42.36          | C9   | 24.61          | C9             | 24.58          |
| C10                 | 199.74         | C10            | 199.26         | C10  | 22.56          | C10            | 22.53          |
|                     |                |                |                | C11  | 13.94          | C11            | 13.88          |
